# Supplementary material for: Exploring Codon Adjustment Strategies towards Escherichia coli-Based Production of Viral Proteins Encoded by HTH1, a Novel Prophage of the Marine Bacterium Hypnocyclicus thermotrophus
Source: MDPI journal article supplement (doi:10.3390/v13071215), 2021-06-23

**A**

Proteins expressed from Codon-optimized gene variants

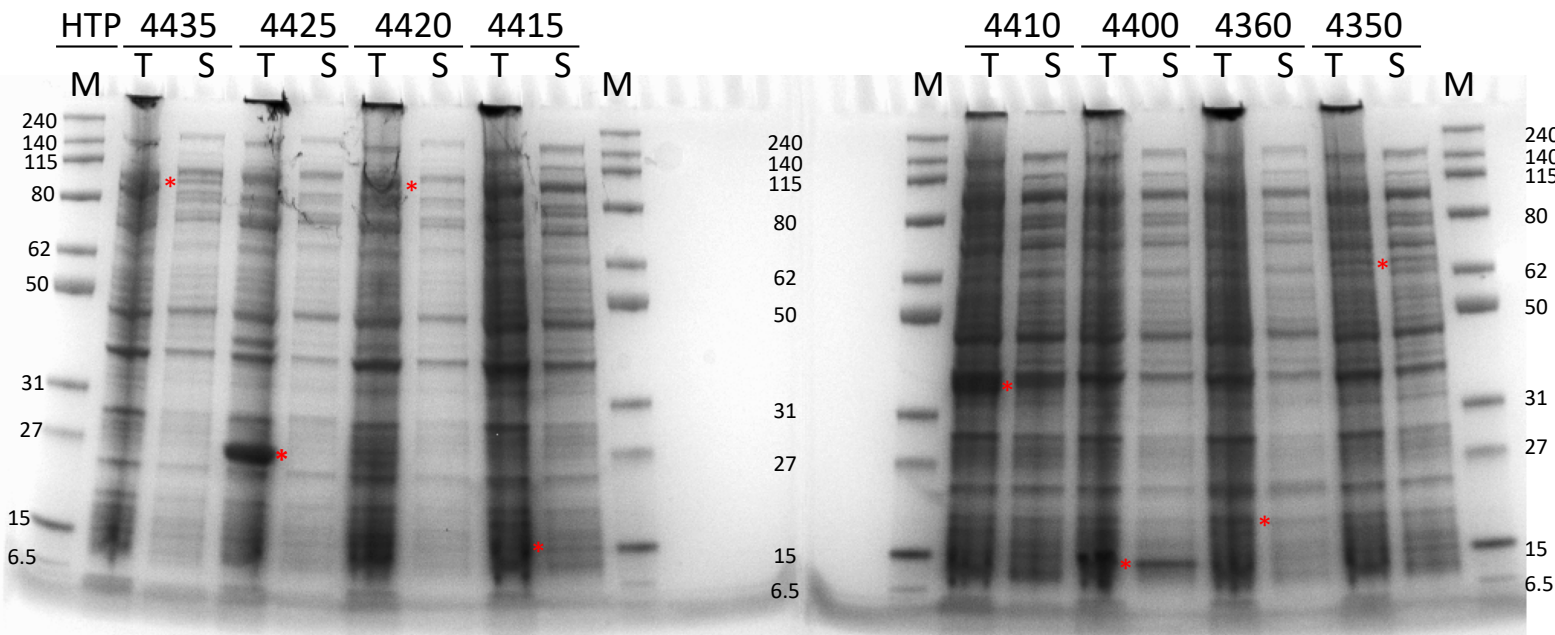**B**

Proteins expressed from Codon-harmonised gene variants - soluble fractions only

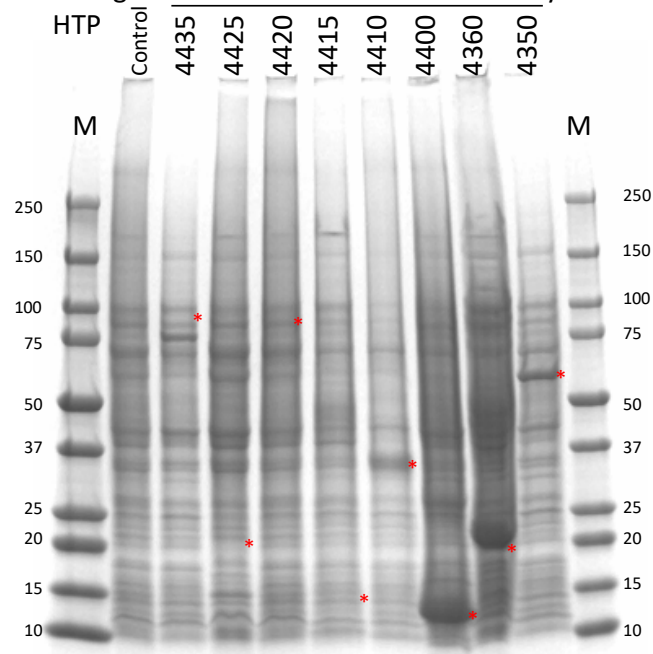

Supplement: s1 [file s1]
