# Supplementary material for: Exploring Codon Adjustment Strategies towards Escherichia coli-Based Production of Viral Proteins Encoded by HTH1, a Novel Prophage of the Marine Bacterium Hypnocyclicus thermotrophus
Source: MDPI journal article supplement (doi:10.3390/v13071215), 2021-06-23
Supplement: s1 [file s1]

**Supplementary Table 1:** The list of prophage-associated CDs identified in the *Hypnocyclicus thermotrophus* genome and their putative functions, predicted by NCBI and PHASTER annotation pipelines. GenBank accession numbers represent the corresponding proteins from each locus, pseudogene entries are noted instead of an accession number. E-values correspond to PHASTER annotation of each entry. Non-available E-Values marked as “NA”. Entry marked with an asterisk (\*) is not found in the three defined regions as it was not annotated by PHASTER (ND), but was manually curated.

| Region | GenBank        | Locus tag     | NCBI annotation                                                                                 | PHASTER annotation                                                                    | E-Value   |
|--------|----------------|---------------|-------------------------------------------------------------------------------------------------|---------------------------------------------------------------------------------------|-----------|
| 1      | WP_134112568.1 | EV215_RS03310 | phosphoribosylformylglycinamidine synthase                                                      | putative phosphoribosyl formylglycinamidine (FGAM) synthase II                        | 9.85e-36  |
| 1      | WP_134112569.1 | EV215_RS03315 | 5-(carboxyamino)imidazole ribonucleotide mutase                                                 | 5-(carboxyamino)imidazole ribonucleotide mutase;                                      | NA        |
| 1      | WP_134112570.1 | EV215_RS03320 | 5-(carboxyamino)imidazole ribonucleotide synthase                                               | 5-(carboxyamino)imidazole ribonucleotide synthase;                                    | NA        |
| 1      | WP_134112631.1 | EV215_RS03325 | phosphoribosylaminoimidazolesuccinocarboxamide synthase                                         | PHAGE_Synech_S_CAM4_NC_031900: hypothetical protein                                   | 6.71e-51  |
| 1      | WP_134112571.1 | EV215_RS03330 | amidophosphoribosyltransferase                                                                  | PHAGE_Pseudo_NV1_NC_042107: hypothetical protein                                      | 7.44e-09  |
| 1      | WP_134112572.1 | EV215_RS03335 | phosphoribosylformylglycinamidine cyclo-ligase                                                  | PHAGE_Synech_S_MbCM100_NC_023584: PurM                                                | 1.46e-80  |
| 1      | WP_134112573.1 | EV215_RS03340 | phosphoribosylglycinamide formyltransferase                                                     | PHAGE_Prochl_P_SSM7_NC_015290: PRGA-formyltransferase                                 | 3.66e-26  |
| 1      | WP_134112574.1 | EV215_RS03345 | bifunctional<br>phosphoribosylaminoimidazolecarboxamide<br>formyltransferase/IMP cyclohydrolase | 5-aminoimidazole-4-carboxamide ribonucleotide<br>formyltransferase/IMP cyclohydrolase | 5.51e-87  |
| ND     | WP_134112775.1 | EV215_RS04350 | DUF262 domain-containing protein *                                                              | -                                                                                     | NA        |
| 2      | WP_134112776.1 | EV215_RS04355 | HNH endonuclease                                                                                | PHAGE_Mycoba_Dlane_NC_042317: baseplate hub assembly protein                          | 4.36e-05  |
| 2      | WP_134112777.1 | EV215_RS04360 | hypothetical protein                                                                            | hypothetical protein                                                                  | NA        |
| 2      | WP_134112778.1 | EV215_RS04365 | recombinase family protein                                                                      | PHAGE_Lactoc_28201_NC_031013: protector from prophage-induced<br>early lysis          | 3.17e-33  |
| 2      | WP_134112779.1 | EV215_RS04370 | recombinase                                                                                     | PHAGE_Deep_s_D6E_NC_019544: recombinase                                               | 1.75e-06  |
| 2      | WP_134112780.1 | EV215_RS04375 | recombinase family protein                                                                      | PHAGE_Bacill_Gamma_NC_007458: site-specific recombinase                               | 1.36e-34  |
| 2      | WP_134112781.1 | EV215_RS04380 | hypothetical protein                                                                            | hypothetical protein                                                                  | NA        |
| 2      | WP_134112782.1 | EV215_RS04385 | hypothetical protein                                                                            | PHAGE_Clostr_phiCT453A_NC_028991: exonuclease A                                       | 0.0       |
| 2      | WP_134112783.1 | EV215_RS04390 | DUF2815 family protein                                                                          | PHAGE_Clostr_phiCT453A_NC_028991: hypothetical protein                                | 7.62e-68  |
| 2      | WP_134112784.1 | EV215_RS04395 | DUF2800 domain-containing protein                                                               | PHAGE_Clostr_phiCT453A_NC_028991: hypothetical protein                                | 7.39e-113 |
| 2      | WP_134112862.1 | EV215_RS04400 | rRNA biogenesis protein rrp5                                                                    | rRNA biogenesis protein rrp5                                                          | NA        |
| 2      | WP_134112785.1 | EV215_RS04405 | hypothetical protein                                                                            | hypothetical protein                                                                  | NA        |
| 2      | WP_134112786.1 | EV215_RS04410 | LysM peptidoglycan-binding domain-containing<br>protein                                         | PHAGE_Clostr_phiCT453A_NC_028991: dsDNA binding protein                               | 7.36e-07  |
| 2      | WP_134112787.1 | EV215_RS04415 | holin                                                                                           | PHAGE_Bacill_PfEFR_5_NC_031055: hypothetical protein                                  | 1.02e-31  |
| 2      | WP_134112863.1 | EV215_RS04420 | glycosyl hydrolase                                                                              | PHAGE_Microb_Eleri_NC_042109: hypothetical protein                                    | 1.64e-45  |

|       |                |               |                                            |                                                                        |           |
|-------|----------------|---------------|--------------------------------------------|------------------------------------------------------------------------|-----------|
| 2     | WP_134112788.1 | EV215_RS04425 | hypothetical protein                       | hypothetical protein                                                   | NA        |
| 2     | WP_134112789.1 | EV215_RS04430 | hypothetical protein                       | PHAGE_Geobac_TP_84_NC_041918: DCTP pyrophosphatase                     | 2.06e-12  |
| 2     | WP_134112790.1 | EV215_RS04435 | hypothetical protein                       | PHAGE_Geobac_TP_84_NC_041918: hypothetical protein                     | 1.42e-85  |
| 2 & 3 | WP_134112791.1 | EV215_RS04440 | phage tail family protein                  | PHAGE_Clostr_phiCD111_NC_028905: Tail component protein                | 8.72e-12  |
| 2 & 3 | Pseudogene     | EV215_RS04445 | phage tail protein                         | phage tail protein                                                     | NA        |
| 2 & 3 | WP_134112864.1 | EV215_RS04450 | hypothetical protein                       | hypothetical protein                                                   | NA        |
| 2 & 3 | WP_134112792.1 | EV215_RS04455 | hypothetical protein                       | hypothetical protein                                                   | NA        |
| 2 & 3 | WP_134112793.1 | EV215_RS04460 | phage tail protein                         | PHAGE_Paenib_Harrison_NC_028746: major tail protein                    | 3.31e-31  |
| 2 & 3 | WP_134112794.1 | EV215_RS04465 | hypothetical protein                       | hypothetical protein                                                   | NA        |
| 2 & 3 | WP_134112795.1 | EV215_RS04470 | HK97 gp10 family phage protein             | PHAGE_Bacill_phIS3501_NC_019502: gp10 family phage protein             | 1.45e-08  |
| 2 & 3 | WP_134112796.1 | EV215_RS04475 | head-tail adaptor protein                  | head-tail adaptor protein                                              | NA        |
| 2 & 3 | WP_134112797.1 | EV215_RS04480 | phage gp6-like head-tail connector protein | phage gp6-like head-tail connector protein                             | NA        |
| 2 & 3 | WP_134112798.1 | EV215_RS04485 | Head fiber protein                         | PHAGE_Escher_Av_05_NC_025830: putative head fiber protein              | 1.46e-09  |
| 2 & 3 | WP_134112799.1 | EV215_RS04490 | phage major capsid protein                 | PHAGE_Azosp_i_Cd_NC_010355: Phage major capsid protein                 | 1.67e-45  |
| 2 & 3 | WP_134112800.1 | EV215_RS04495 | phage portal protein                       | PHAGE_Burkho_phi6442_NC_009235: gp4, phage portal protein, HK97 family | 9.04e-81  |
| 2 & 3 | WP_134112801.1 | EV215_RS04500 | terminase large subunit                    | PHAGE_Nocard_NBR1_NC_016569: terminase large subunit                   | 2.50e-98  |
| 2 & 3 | Pseudogene     | EV215_RS04505 | hypothetical protein                       | hypothetical protein                                                   | NA        |
| 2 & 3 | WP_134112802.1 | EV215_RS04510 | DUF5049 domain-containing protein          | PHAGE_Halovi_HCTV_1_NC_021330: hypothetical protein                    | 2.61e-09  |
| 2 & 3 | WP_134112803.1 | EV215_RS04515 | DUF4314 domain-containing protein          | PHAGE_Bacill_SP_15_NC_031245: hypothetical protein                     | 2.90e-07  |
| 3     | WP_134112804.1 | EV215_RS04520 | virulence protein                          | virulence protein                                                      | NA        |
| 3     | WP_134112865.1 | EV215_RS04525 | DNA (cytosine-5-)-methyltransferase        | PHAGE_Salmon_SJ46_NC_031129: hypothetical protein                      | 1.95e-36  |
| 3     | WP_134112805.1 | EV215_RS04530 | DNA modification methylase                 | PHAGE_Strept_EJ_1_NC_005294: transferase                               | 5.56e-74  |
| 3     | WP_134112806.1 | EV215_RS04535 | terminase                                  | terminase                                                              | NA        |
| 3     | WP_134112866.1 | EV215_RS04540 | HNH endonuclease                           | PHAGE_Bacill_phIS3501_NC_019502: HNH endonuclease domain protein       | 3.53e-14  |
| 3     | WP_134112807.1 | EV215_RS04545 | DUF1492 domain-containing protein          | PHAGE_Strept_phiARI0462_NC_031942: DCTP pyrophosphatase                | 5.52e-07  |
| 3     | WP_134112808.1 | EV215_RS04550 | hypothetical protein                       | hypothetical protein                                                   | NA        |
| 3     | WP_134112809.1 | EV215_RS04555 | DEAD/DEAH box helicase                     | PHAGE_Enterophaga_phiFL4A_NC_013644: DNA helicase                      | 3.35e-174 |
| 3     | WP_134112810.1 | EV215_RS04560 | VRR-NUC domain-containing protein          | PHAGE_Endosy_APSE_1_NC_000935: hypothetical protein                    | 2.30e-20  |
| 3     | WP_134112811.1 | EV215_RS04565 | hypothetical protein                       | PHAGE_Clostr_phiCT453A_NC_028991: hypothetical protein                 | 0.0       |
| 3     | WP_134112867.1 | EV215_RS04570 | DUF4406 domain-containing protein          | PHAGE_Gordon_Gspu11_NC_030932: ribonucleotide reductase A subunit      | 6.96e-09  |
| 3     | WP_134112812.1 | EV215_RS04575 | hypothetical protein                       | hypothetical protein                                                   | NA        |
| 3     | WP_134112813.1 | EV215_RS04580 | transcriptional regulator                  | PHAGE_Enterophaga_mEp460_NC_019716: regulatory protein Rha             | 1.01e-21  |

**Supplementary Table 2:** HHpred-suggested annotations of prophage-associated genes. GenBank accession numbers represent the corresponding proteins from each locus. Pseudogene entries are noted instead of an accession number. E-values correspond to HHpred annotation for each entry. Non-available E-Values marked as “NA”. Entry marked with an asterisk (\*) is not found in the three defined regions as it was not annotated by PHASTER (ND), but was manually added to the analysis.

| Region | GenBank        | Locus tag     | HHpred annotation                                                                                                             | Prob. | E-Value   |
|--------|----------------|---------------|-------------------------------------------------------------------------------------------------------------------------------|-------|-----------|
| 1      | WP_134112568.1 | EV215_RS03310 | 4LGY_A Phosphoribosylformylglycinamidine synthase (E.C.6.3.5.3)                                                               | 100   | 3.00E-138 |
| 1      | WP_134112569.1 | EV215_RS03315 | 1O4V_A phosphoribosylaminoimidazole mutase PurE (E.C.4.1.1.21)                                                                | 100   | 5.8E-29   |
| 1      | WP_134112570.1 | EV215_RS03320 | 3AX6_A Phosphoribosylaminoimidazole carboxylase, ATPase subunit (E.C.6.3.4.18)                                                | 100   | 1.2E-44   |
| 1      | WP_134112631.1 | EV215_RS03325 | 2GQR_A Phosphoribosylaminoimidazole-succinocarboxamide synthase (E.C.6.3.2.6)                                                 | 100   | 3.9E-62   |
| 1      | WP_134112571.1 | EV215_RS03330 | 6LBP_A Amidophosphoribosyltransferase 2, chloroplastic (E.C.2.4.2.14)                                                         | 100   | 2.9E-63   |
| 1      | WP_134112572.1 | EV215_RS03335 | 5VK4_A Phosphoribosylformylglycinamidine cyclo-ligase (E.C.6.3.3.1)                                                           | 100   | 6.9E-44   |
| 1      | WP_134112573.1 | EV215_RS03340 | 1JKX_B Phosphoribosylglycinamide formyltransferase (E.C.2.1.2.2)                                                              | 100   | 4.9E-25   |
| 1      | WP_134112574.1 | EV215_RS03345 | 4EHI_B Bifunctional purine biosynthesis protein PurH                                                                          | 100   | 1.00E-133 |
| ND*    | WP_134112775.1 | EV215_RS04350 | 6JIV_B SspE protein; DNase*                                                                                                   | 100   | 5.00E-37  |
| 2      | WP_134112776.1 | EV215_RS04355 | P13340 END7_BPT4 Recombination endonuclease VII                                                                               | 98.1  | 4.50E-06  |
| 2      | WP_134112777.1 | EV215_RS04360 | hypothetical protein                                                                                                          |       | NA        |
| 2      | WP_134112778.1 | EV215_RS04365 | 4BQQ_B Integrase                                                                                                              | 100   | 4.10E-42  |
| 2      | WP_134112779.1 | EV215_RS04370 | 5UDO_F Putative integrase                                                                                                     | 99.7  | 1.50E-16  |
| 2      | WP_134112780.1 | EV215_RS04375 | 4BQQ_B Integrase                                                                                                              | 100   | 8.20E-43  |
| 2      | WP_134112781.1 | EV215_RS04380 | hypothetical protein                                                                                                          |       | NA        |
| 2      | WP_134112782.1 | EV215_RS04385 | P06225 DPOL_BPSP2 DNA polymerase OS= <i>Bacillus</i> phage SP02                                                               | 100   | 4.90E-78  |
| 2      | WP_134112783.1 | EV215_RS04390 | 4JG2_A Phage-related protein                                                                                                  | 100   | 6.10E-37  |
| 2      | WP_134112784.1 | EV215_RS04395 | Q9T1P7 VP51_BPAPS Putative protein p51 OS= <i>Acyrtosiphon pisum</i> secondary endosymbiont phage 1                           | 100   | 1.90E-50  |
| 2      | WP_134112862.1 | EV215_RS04400 | Q9T1P5 VP53_BPAPS Putative protein p53 OS= <i>Acyrtosiphon pisum</i> secondary endosymbiont phage 1                           | 99.5  | 2.70E-13  |
| 2      | WP_134112785.1 | EV215_RS04405 | hypothetical protein                                                                                                          |       | NA        |
| 2      | WP_134112786.1 | EV215_RS04410 | 4KNK_B Bifunctional autolysin (E.C.3.5.1.28, 3.2.1.96); peptidoglycan, autolysin, amidase, N-acetylmuramoyl-L-alanine amidase | 99.7  | 2.80E-16  |
| 2      | WP_134112787.1 | EV215_RS04415 | Q9ZXD8 VLYS_BPPH1 Probable holin                                                                                              | 100   | 4.90E-26  |
| 2      | WP_134112863.1 | EV215_RS04420 | 3W4R_A Chitinase (E.C.3.2.1.14); insect, glycosyl hydrolase                                                                   | 100   | 9.90E-30  |
| 2      | WP_134112788.1 | EV215_RS04425 | hypothetical protein                                                                                                          |       | NA        |
| 2      | WP_134112789.1 | EV215_RS04430 | hypothetical protein                                                                                                          |       | NA        |
| 2      | WP_134112790.1 | EV215_RS04435 | Q0PDK6 Fiber_BPSP Tail spike protein OS= <i>Bacillus</i> phage SPP1                                                           | 100   | 1.60E-25  |

|       |                |               |                                                                                                                                   |      |          |
|-------|----------------|---------------|-----------------------------------------------------------------------------------------------------------------------------------|------|----------|
| 2 & 3 | WP_134112791.1 | EV215_RS04440 | 2X8K_C Hypothetical protein 19.1; viral protein, distal tail protein                                                              | 100  | 6.90E-31 |
| 2 & 3 | Pseudogene     | EV215_RS04445 | phage tail protein                                                                                                                |      | NA       |
| 2 & 3 | WP_134112864.1 | EV215_RS04450 | PF09550.11 ; Phage_TAC_6 ; Phage tail assembly chaperone protein,                                                                 | 98.5 | 2.90E-07 |
| 2 & 3 | WP_134112792.1 | EV215_RS04455 | PF12363.9 ; Phage_TAC_12 ; Phage tail assembly chaperone protein, TAC                                                             | 99.4 | 4.30E-12 |
| 2 & 3 | WP_134112793.1 | EV215_RS04460 | PF04630.13 ; Phage_TTP_1 ; Phage tail tube protein                                                                                | 100  | 1.20E-32 |
| 2 & 3 | WP_134112794.1 | EV215_RS04465 | 6TE9_F Adaptor protein Rcc01688, Portal protein; "neck", "portal", "capsid", "tail tube"; 3.58A { <i>Rhodobacter capsulatus</i> } | 99.4 | 3.30E-11 |
| 2 & 3 | WP_134112795.1 | EV215_RS04470 | Q01261 GPG_BPMU Putative capsid assembly protein G OS=Escherichia phage                                                           | 99.5 | 2.20E-12 |
| 2 & 3 | WP_134112796.1 | EV215_RS04475 | 6TE9_E Adaptor protein Rcc01688, Portal protein; "neck", "portal", "capsid", "tail tube"; 3.58A { <i>Rhodobacter capsulatus</i> } | 99.9 | 8.80E-22 |
| 2 & 3 | WP_134112797.1 | EV215_RS04480 | cd08051 gp6_gp15_like; Head-Tail Connector Proteins gp6 and gp15                                                                  | 99.7 | 3.40E-15 |
| 2 & 3 | WP_134112798.1 | EV215_RS04485 | >P11186 VG85_BPNF Head fiber protein OS=Bacillus phage Nf                                                                         | 99.6 | 1.80E-15 |
| 2 & 3 | WP_134112799.1 | EV215_RS04490 | 3QPR_F Major capsid protein; Virus Procapsid particles, VIRUS; 5.2A {Enterobacteria phage HK97}                                   | 100  | 2.00E-37 |
| 2 & 3 | WP_134112800.1 | EV215_RS04495 | P49859 PORTL_BPHK7 Portal protein OS=Enterobacteria phage HK97                                                                    | 100  | 6.80E-32 |
| 2 & 3 | WP_134112801.1 | EV215_RS04500 | P59217 TERL_BPSF5 Putative terminase large subunit OS=Shigella phage SfV                                                          | 100  | 2.00E-47 |
| 2 & 3 | Pseudogene     | EV215_RS04505 | hypothetical protein                                                                                                              |      | NA       |
| 2 & 3 | WP_134112802.1 | EV215_RS04510 | PF16468.6; DUF5049 ; Domain of unknown function (DUF5049)                                                                         | 100  | 5.80E-31 |
| 2 & 3 | WP_134112803.1 | EV215_RS04515 | PF14192.7; DUF4314 ; Domain of unknown function (DUF4314)                                                                         | 100  | 7.60E-27 |
| 3     | WP_134112804.1 | EV215_RS04520 | PF12224.9; Amidoligase_2 ; Putative amidoligase enzyme                                                                            | 99.9 | 1.70E-21 |
| 3     | WP_134112865.1 | EV215_RS04525 | P09915 MTBR_BPRH1 Modification methylase Rho1sI OS=Bacillus phage                                                                 | 100  | 7.60E-41 |
| 3     | WP_134112805.1 | EV215_RS04530 | 1BOO_A protein (N-4 cytosine-specific methyltransferase PVU; Type II DNA-(cytosine N4) METHYLTRANSFERASE                          | 100  | 1.30E-26 |
| 3     | WP_134112806.1 | EV215_RS04535 | PF05119.13; Terminase_4 ; Phage terminase, small subunit                                                                          | 99.7 | 1.20E-15 |
| 3     | WP_134112866.1 | EV215_RS04540 | 5H0M_A HNH endonuclease; Thermophilic bacteriophage, HNH Endonuclease                                                             | 99.6 | 4.80E-15 |
| 3     | WP_134112807.1 | EV215_RS04545 | O34055 ARPU_BPO12 Putative autolysin regulatory protein ArpU OS=Streptococcus phage O1205 OX=85154 GN=arpU                        | 99.2 | 1.10E-09 |
| 3     | WP_134112808.1 | EV215_RS04550 | hypothetical protein                                                                                                              |      | NA       |
| 3     | WP_134112809.1 | EV215_RS04555 | Q9T1Q7 VP41_BPAPS Putative protein p41 OS=Acyrtosiphon pisum secondary endosymbiont phage 1                                       | 100  | 1.60E-50 |

|   |                |               |                                                                                                                        |      |          |
|---|----------------|---------------|------------------------------------------------------------------------------------------------------------------------|------|----------|
| 3 | WP_134112810.1 | EV215_RS04560 | 4QBN_B Uncharacterized protein; Nuclease, hydrolase; HET: SO4; 1.85A ( <i>Salmonella</i> phage SETP3) SCOP: c.52.1.35; | 99.9 | 2.30E-24 |
| 3 | WP_134112811.1 | EV215_RS04565 | P10277 Prim_BPP4 Putative P4-specific DNA primase OS=Enterobacteria phage P4                                           | 99.8 | 2.00E-19 |
| 3 | WP_134112867.1 | EV215_RS04570 | 1S2L_C purine trans deoxyribosylase (E.C.2.4.2.6); PTD, native, 2'-purine deoxyribosyltransferase                      | 99.6 | 1.60E-13 |
| 3 | WP_134112812.1 | EV215_RS04575 | hypothetical protein                                                                                                   |      | NA       |
| 3 | WP_134112813.1 | EV215_RS04580 | P21417 Y23K_BPP22 Uncharacterized protein                                                                              | 98.3 | 1.00E-04 |

**Supplementary Table 3:** Highest identities of HTH1 proteins (EV215\_RS03310 to EV215\_RS03345) with at least 3 protein hits in Aclame [1] (A CLAssification of Mobile genetic Elements) from the head-neck-tail module analysis performed using VIRFAM [2].

| Protein Superfamily        | Corresponding Protein in Aclame | Aclame Phage                | Seq. Identity (%) |
|----------------------------|---------------------------------|-----------------------------|-------------------|
| Major Capsid Protein (MCP) | protein:vir:4511                | V                           | 29 %              |
|                            | protein:vir:4456                | ST64B                       | 29 %              |
|                            | protein:vir:485                 | P27                         | 29 %              |
| Portal                     | protein:vir:100150              | phi1026b                    | 38 %              |
|                            | protein:vir:80333               | phi644-2                    | 36 %              |
|                            | protein:vir:1431                | phiE125                     | 36 %              |
| Terminase (TermL)          | protein:vir:4335                | D3                          | 34 %              |
|                            | protein:vir:81178               | <i>Geobacillus</i> virus E2 | 33 %              |
|                            | protein:vir:105086              | phiKO2                      | 33 %              |
| Major Tail Protein (MTP)   | protein:vir:95370               | GBSV1                       | 26 %              |
|                            | protein:vir:102037              | Fah                         | 26 %              |
|                            | protein:vir:102845              | Cherry                      | 26 %              |
| Adaptor (Ad1)              | protein:vir:1384                | phi3626                     | 28 %              |
|                            | protein:vir:4512                | V                           | 26 %              |
|                            | protein:vir:1271                | phi-105                     | 26 %              |
| Head Closure (Hc1)         | protein:vir:81177               | <i>Geobacillus</i> virus E2 | 22 %              |
|                            | protein:vir:1890                | HK022                       | 22 %              |
|                            | protein:vir:193                 | HK97                        | 21 %              |
| Neck (Ne1)                 | protein:vir:102085              | Fah                         | 26 %              |
|                            | protein:vir:102875              | Cherry                      | 26 %              |
|                            | protein:vir:107568              | Gamma                       | 26 %              |
| Tail Completion (Tc1)      | protein:vir:1274                | phi-105                     | 26 %              |
|                            | protein:vir:1387                | phi3626                     | 23 %              |
|                            | protein:vir:102086              | Fah                         | 18 %              |

**Supplementary Table 4:** Amino acid sequence comparisons of target HTH1 proteins to their homologs in the three chosen viral gene clusters, informed by protein-protein blast (blastp) searches using NCBI BLAST [3]. A Protein Data Bank (PDB) [4] identifier is included of the PDB hit with the highest similarity, where available. NA indicates no match/no data available.

| Hypnocyclus<br>thermotrophus phage H1 |            | IMGVR                             |                     | NCBI                         |                     |                                 |                     | Protein Data Bank (PDB) |                  |      |
|---------------------------------------|------------|-----------------------------------|---------------------|------------------------------|---------------------|---------------------------------|---------------------|-------------------------|------------------|------|
|                                       |            | Marine anoxygenic<br>community R3 |                     | Streptococcus phage Javan630 |                     | Erysipelothrix phage<br>phi1605 |                     |                         |                  |      |
| Locus Tag                             | Identifier | %<br>Identity                     | % Query<br>Coverage | % Identity                   | % Query<br>Coverage | %<br>Identity                   | % Query<br>Coverage | %<br>Identity           | % Query<br>Cover | ID   |
| EV215_RS04435                         | HTP4435    | 98                                | 100                 | 83.23                        | 100                 | 82.76                           | 100                 | NA                      | NA               | NA   |
| EV215_RS04425                         | HTP4425    | 94                                | 100                 | 80.41                        | 100                 | 78.87                           | 100                 | NA                      | NA               | NA   |
| EV215_RS04420                         | HTP4420    | 98                                | 99                  | 80                           | 99                  | 80.61                           | 99                  | 26.34                   | 28               | 4S3J |
| EV215_RS04415                         | HTP4415    | 99                                | 100                 | 75.74                        | 100                 | 75                              | 100                 | NA                      | NA               | NA   |
| EV215_RS04410                         | HTP4410    | 93                                | 100                 | NA                           | NA                  | NA                              | NA                  | 34.92                   | 18               | 3HMB |
| EV215_RS04400                         | HTP4400    | 96                                | 100                 | 55.13                        | 74                  | 65.38                           | 99                  | NA                      | NA               | NA   |
| EV215_RS04385                         | HTP4385    | 89                                | 100                 | 72.51                        | 64                  | 75.91                           | 100                 | 25.64                   | 23               | 1D9D |
| EV215_RS04360                         | HTP4360    | 97                                | 100                 | NA                           | NA                  | NA                              | NA                  | NA                      | NA               | NA   |
| EV215_RS04350                         | HTP4350    | 97                                | 100                 | NA                           | NA                  | NA                              | NA                  | NA                      | NA               | NA   |

**Supplementary Table 5:** Detailed information on the HTH1 proteins chosen for expression trials. Candidate protein molecular weight (Mw) and isoelectric point (pI) calculated using ExPASy compute pI/Mw tool [5]. His6 indicates the hexahistidine affinity tag.

| Identifier | Mw (kDa) | pI   | Proposed Function                      | Vector      | His-Tag         |
|------------|----------|------|----------------------------------------|-------------|-----------------|
| HTP4435    | 93       | 4.73 | Endopeptidase tail                     | pET-21b (+) | C-terminal His6 |
| HTP4425    | 22       | 6.83 | Hypothetical protein                   | pET-21b (+) | C-terminal His6 |
| HTP4420    | 94       | 4.88 | Glycosyl hydrolase 18                  | pET-21b (+) | C-terminal His6 |
| HTP4415    | 15       | 5.05 | Holin, toxin secretion/phage lysis     | pET-21b (+) | C-terminal His6 |
| HTP4410    | 35       | 9.06 | N-acetylmuramoyl-L-alanine amidase     | pET-21b (+) | C-terminal His6 |
| HTP4400    | 11.5     | 5.45 | rRNA biogenesis protein rrp5, putative | pET-21b (+) | C-terminal His6 |
| HTP4385    | 74       | 8.79 | DNA Polymerase                         | pET-21b (+) | C-terminal His6 |
| HTP4360    | 20       | 5.48 | hypothetical protein                   | pET-21b (+) | C-terminal His6 |
| HTP4350    | 66       | 5.92 | DNase                                  | pET-21b (+) | C-terminal His6 |

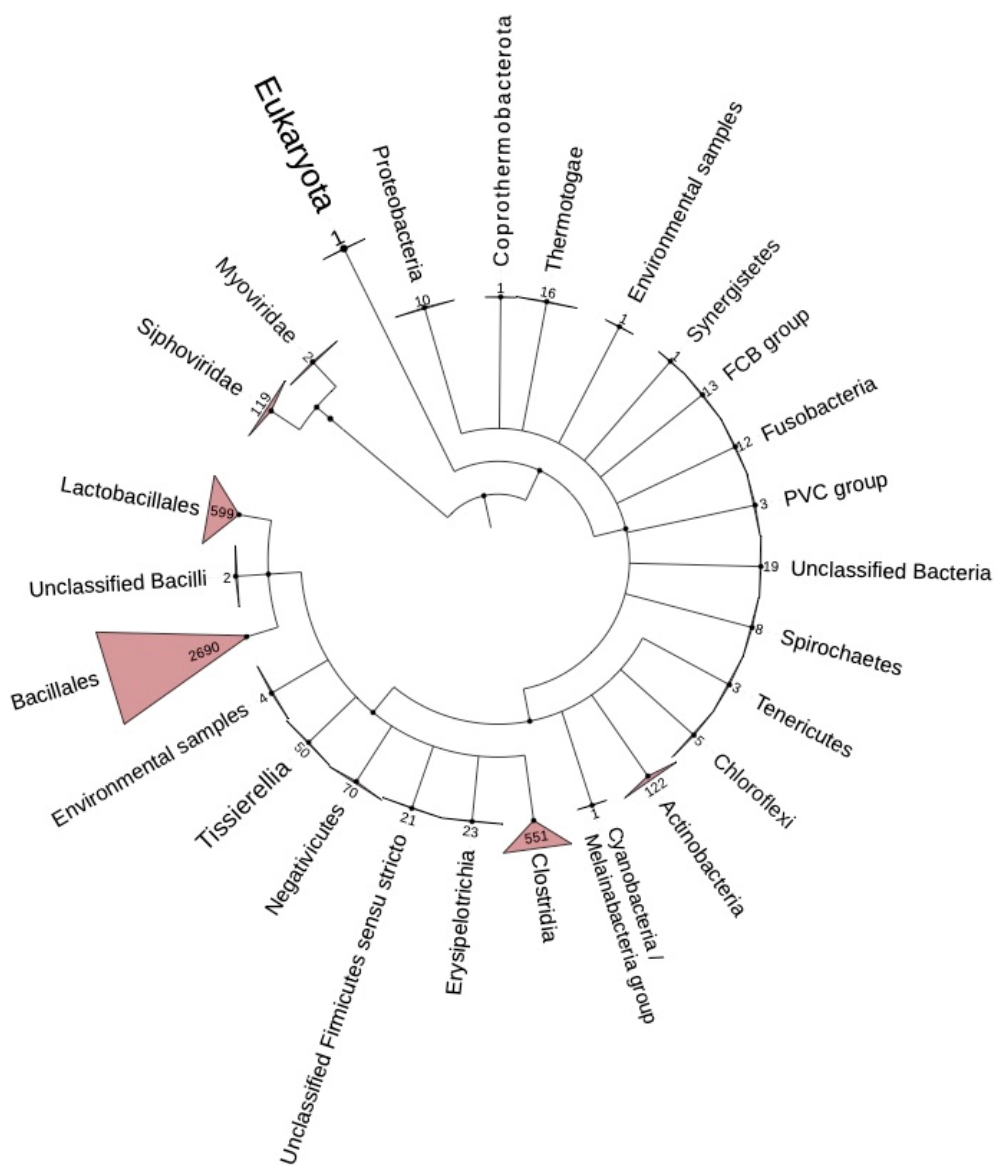

**Supplementary Figure 1:** Taxonomic species distribution of the blastx search results of the HTH1 genes against the NCBI non-redundant (nr) nucleotide database, generated as described in the materials and methods section. Numbers next to each node indicate the number of unique species represented by each cartoon.





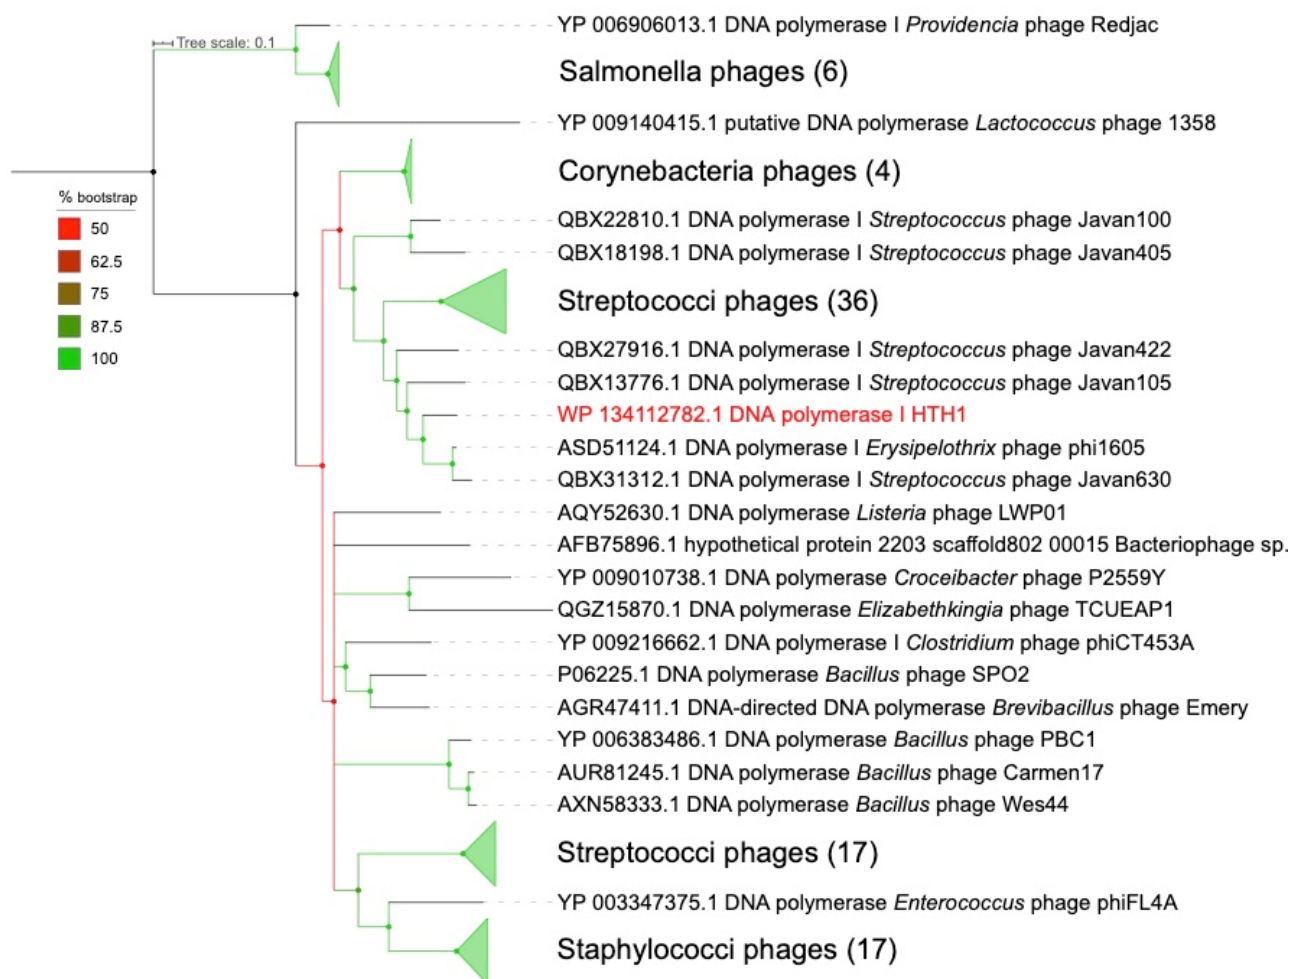

**Supplementary Figure 2:** Phylogeny analysis of 625 amino acids long alignment of the DNA polymerase I proteins from 101 top phage hits using maximum likelihood with 1000 bootstrap replicates. The tree is center-rooted and the scale bar represents the average number of amino acid substitutions per site. Numbers next to collapsed clades represent the number of leaves covered by each cartoon. The HTH1 entry is highlighted in red.

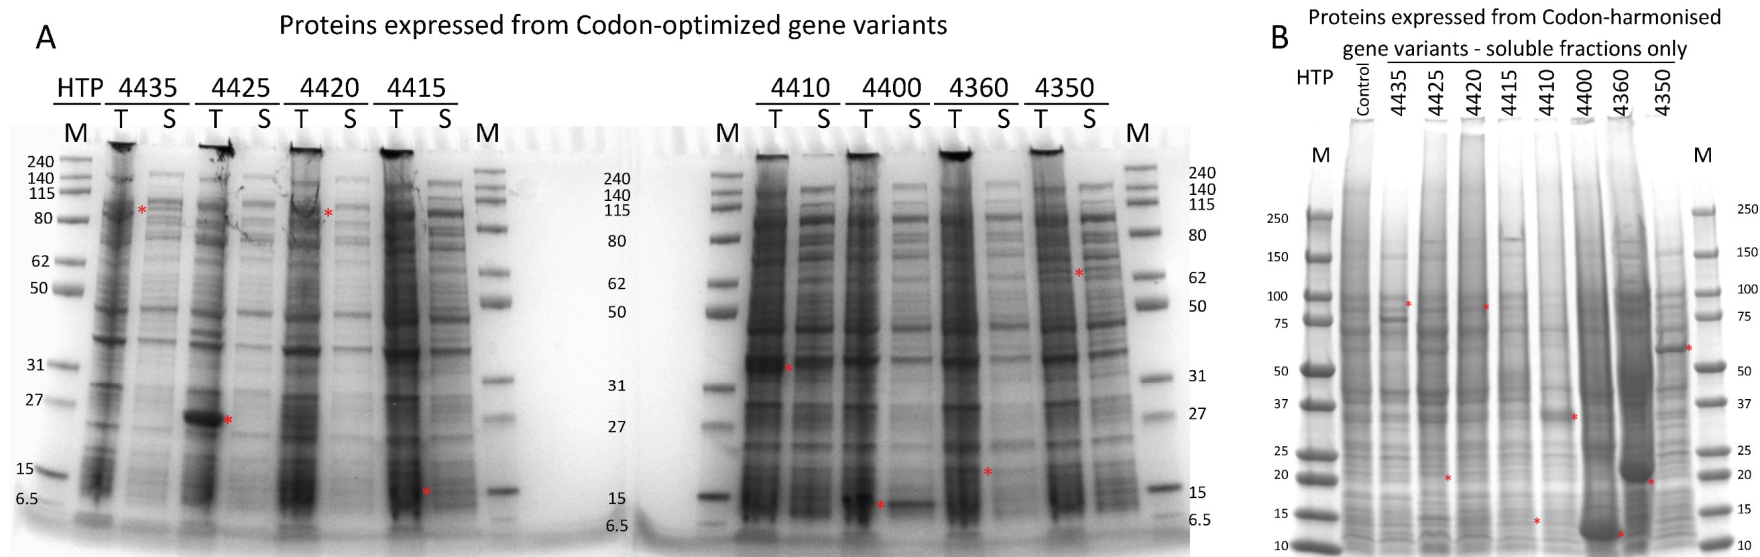

**Supplementary Figure 3:** SDS-PAGE images from protein (over)expression trials with (A) Codon-harmonized and (B) Codon-optimized sets of genes. The HTP prefix and the numbers above the lanes correspond to the identifiers of the genes tested. T and S refer to total (crude) and soluble (clear) lysate fractions, respectively. M indicates the protein marker. Numbers next to each protein marker lane show the respective molecular weight labels, in kDa. Red asterisks indicate the expected position of each protein, inferred from their molecular weight.

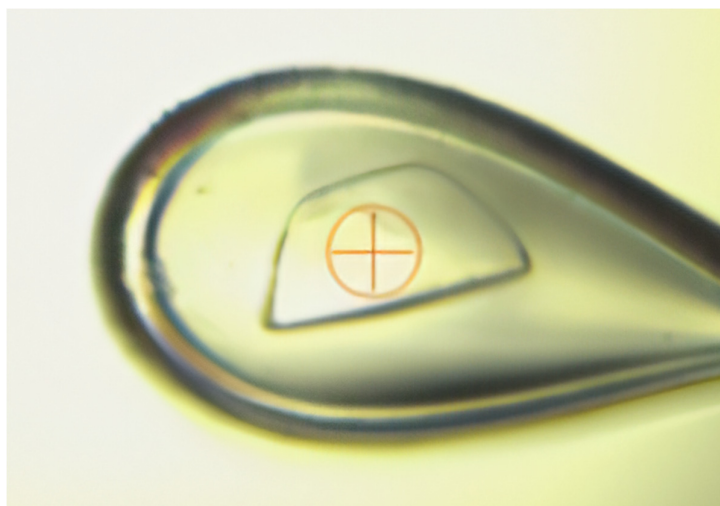

**Supplementary Figure 5:** Protein crystal of HTP4350 produced from codon-harmonized gene variant pictured within the loop, mounted for diffraction data collection.

#### References:

1. Leplae, R.; Lima-Mendez, G.; Toussaint, A. ACLAME: A CLAssification of Mobile genetic Elements, update 2010. *Nucleic Acids Res.* **2010**, *38*, D57–D61, doi:10.1093/nar/gkp938.
2. Lopes, A.; Tavares, P.; Petit, M.A.; Guérois, R.; Zinn-Justin, S. Automated classification of tailed bacteriophages according to their neck organization. *BMC Genomics* **2014**, *15*, doi:10.1186/1471-2164-15-1027.
3. Altschul, S.F.; Gish, W.; Miller, W.; Myers, E.W.; Lipman, D.J. Basic local alignment search tool. *J. Mol. Biol.* **1990**, *215*, 403–410, doi:10.1016/s0022-2836(05)80360-2.
4. Berman, H.M.; Westbrook, J.; Feng, Z.; Gilliland, G.; Bhat, T.N.; Weissig, H.; Shindyalov, I.N.; Bourne, P.E. The Protein Data Bank. *Nucleic Acids Res.* **2000**, *28*, 235–242, doi:10.1093/nar/28.1.235.
5. Swiss Institute of Bioinformatics ExPASy - Compute pI/Mw tool. Available online: [https://web.expasy.org/compute\\_pi/](https://web.expasy.org/compute_pi/) (accessed on Apr 14, 2018).
