# Supplementary figures and images for: Exploring Codon Adjustment Strategies towards Escherichia coli-Based Production of Viral Proteins Encoded by HTH1, a Novel Prophage of the Marine Bacterium Hypnocyclicus thermotrophus
Source: MDPI journal article supplement (doi:10.3390/v13071215), 2021-06-23

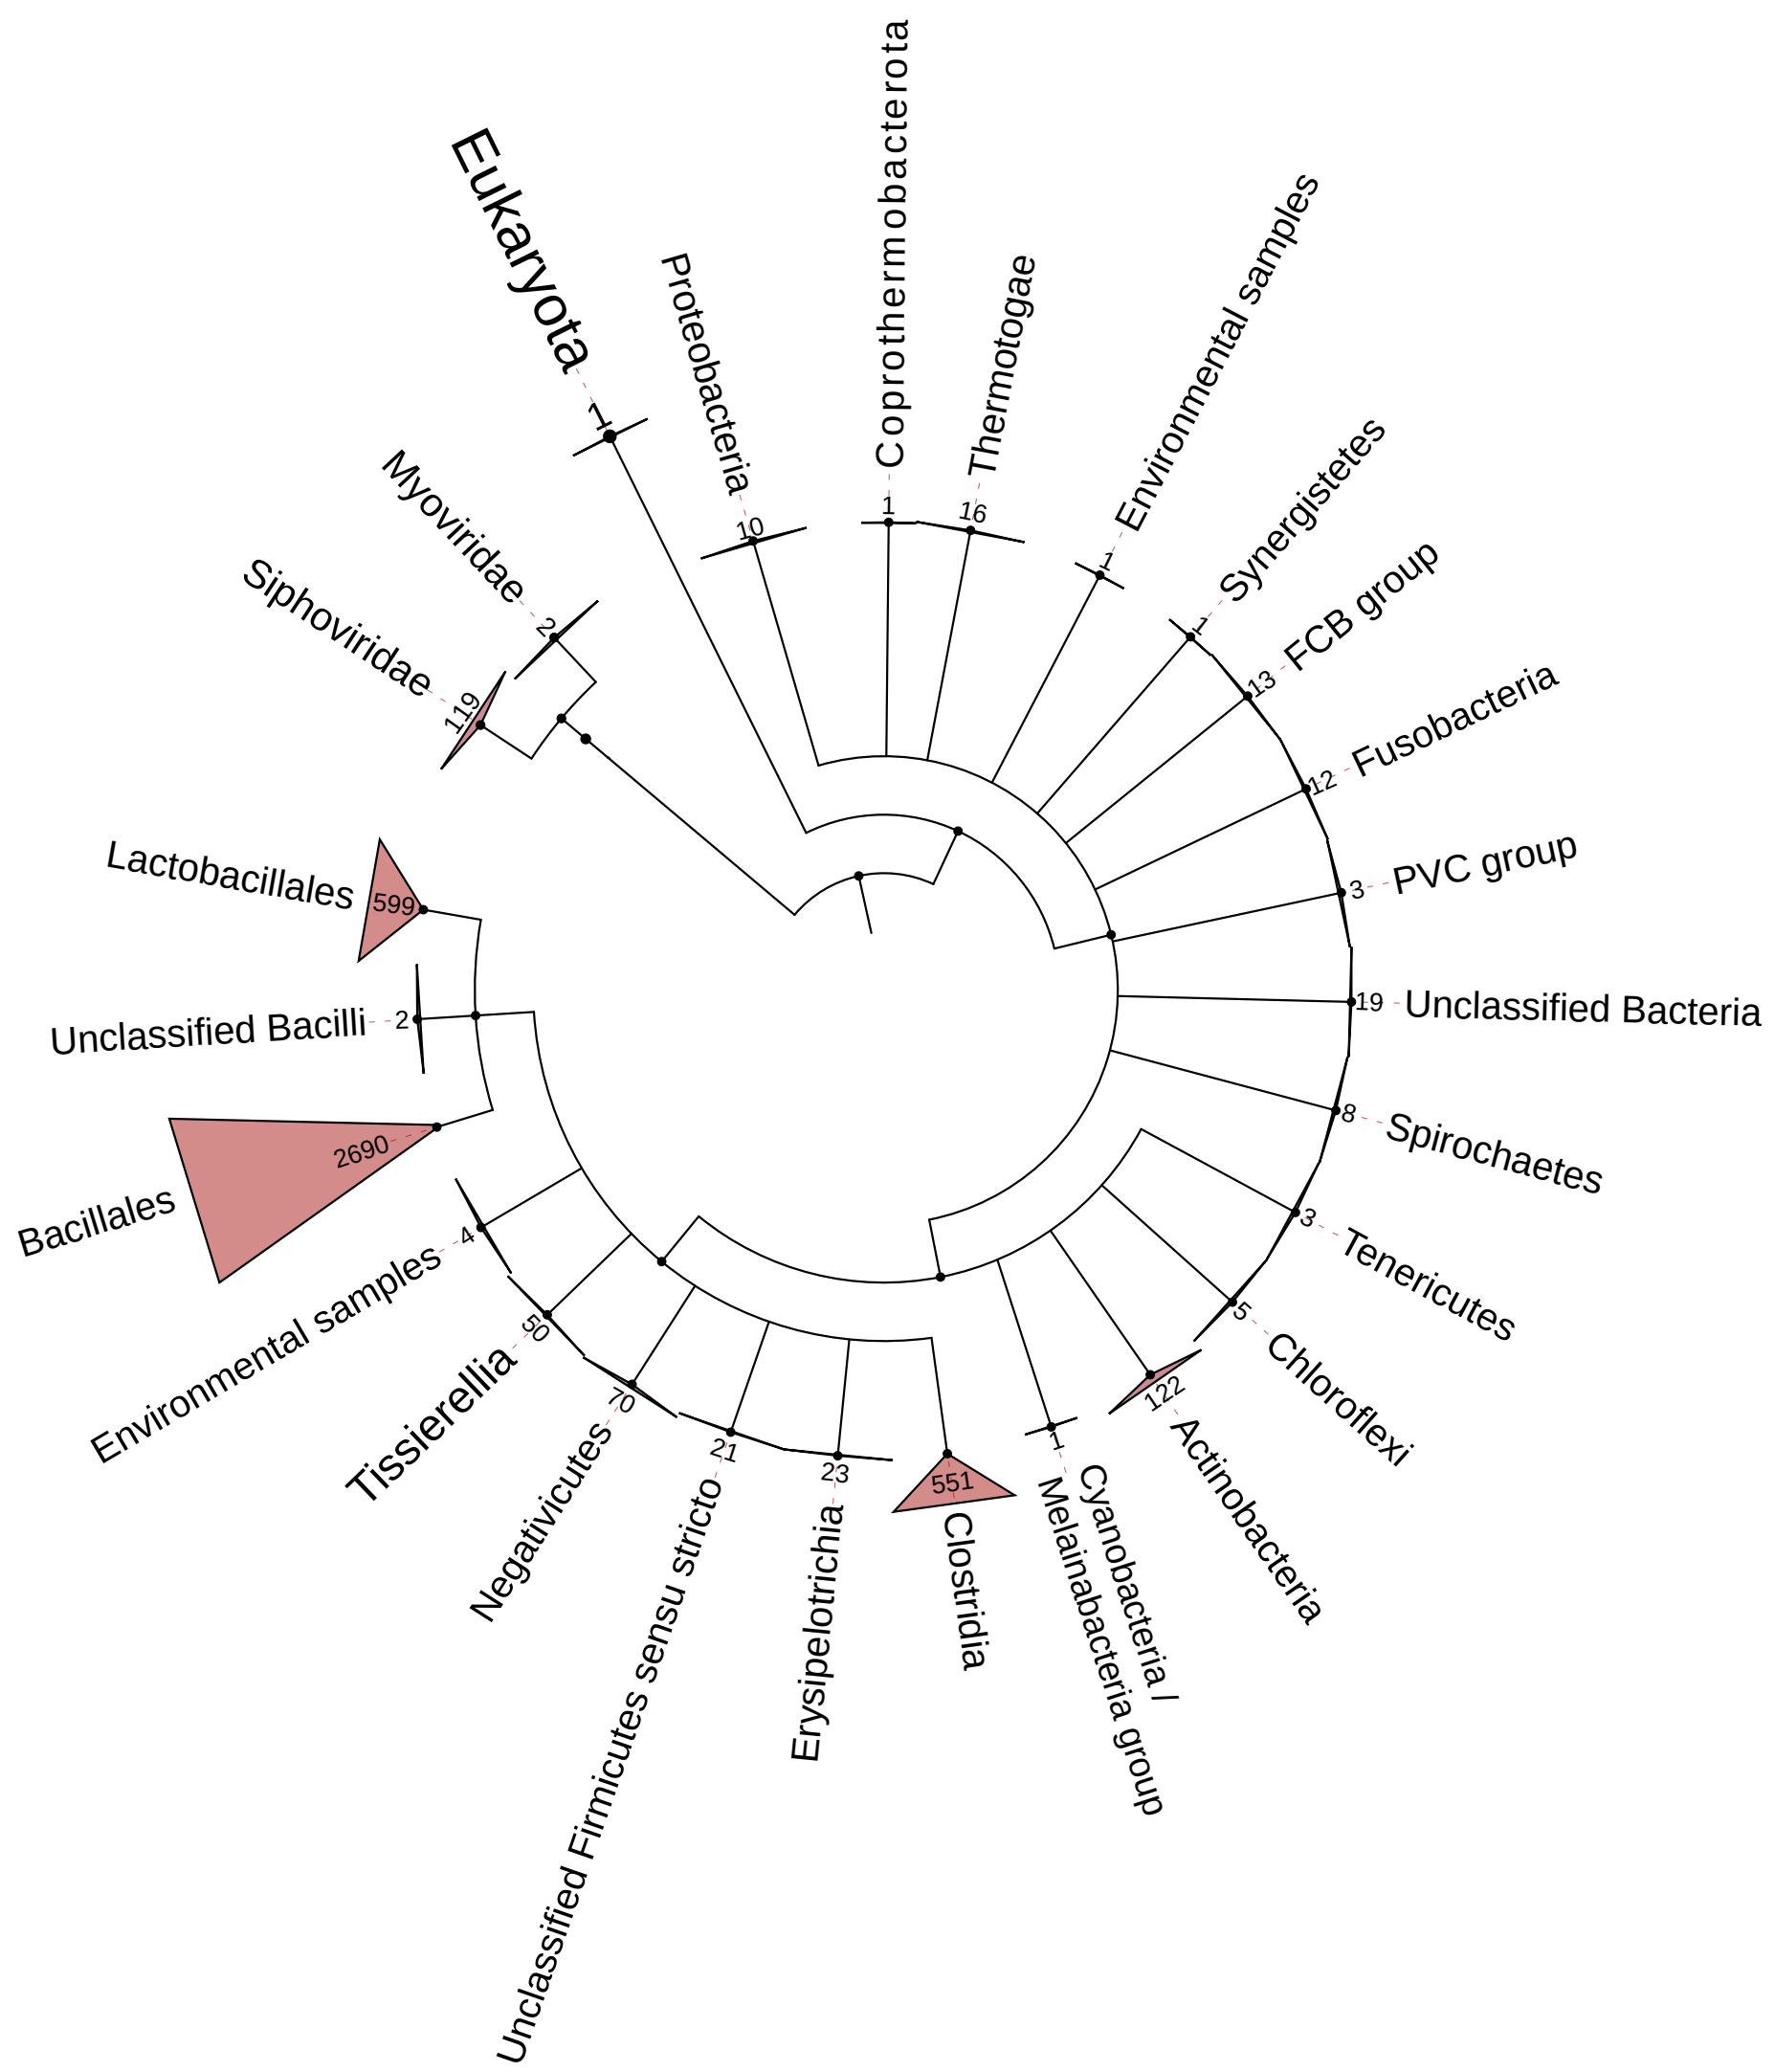

Supplement: s1 [file s1]

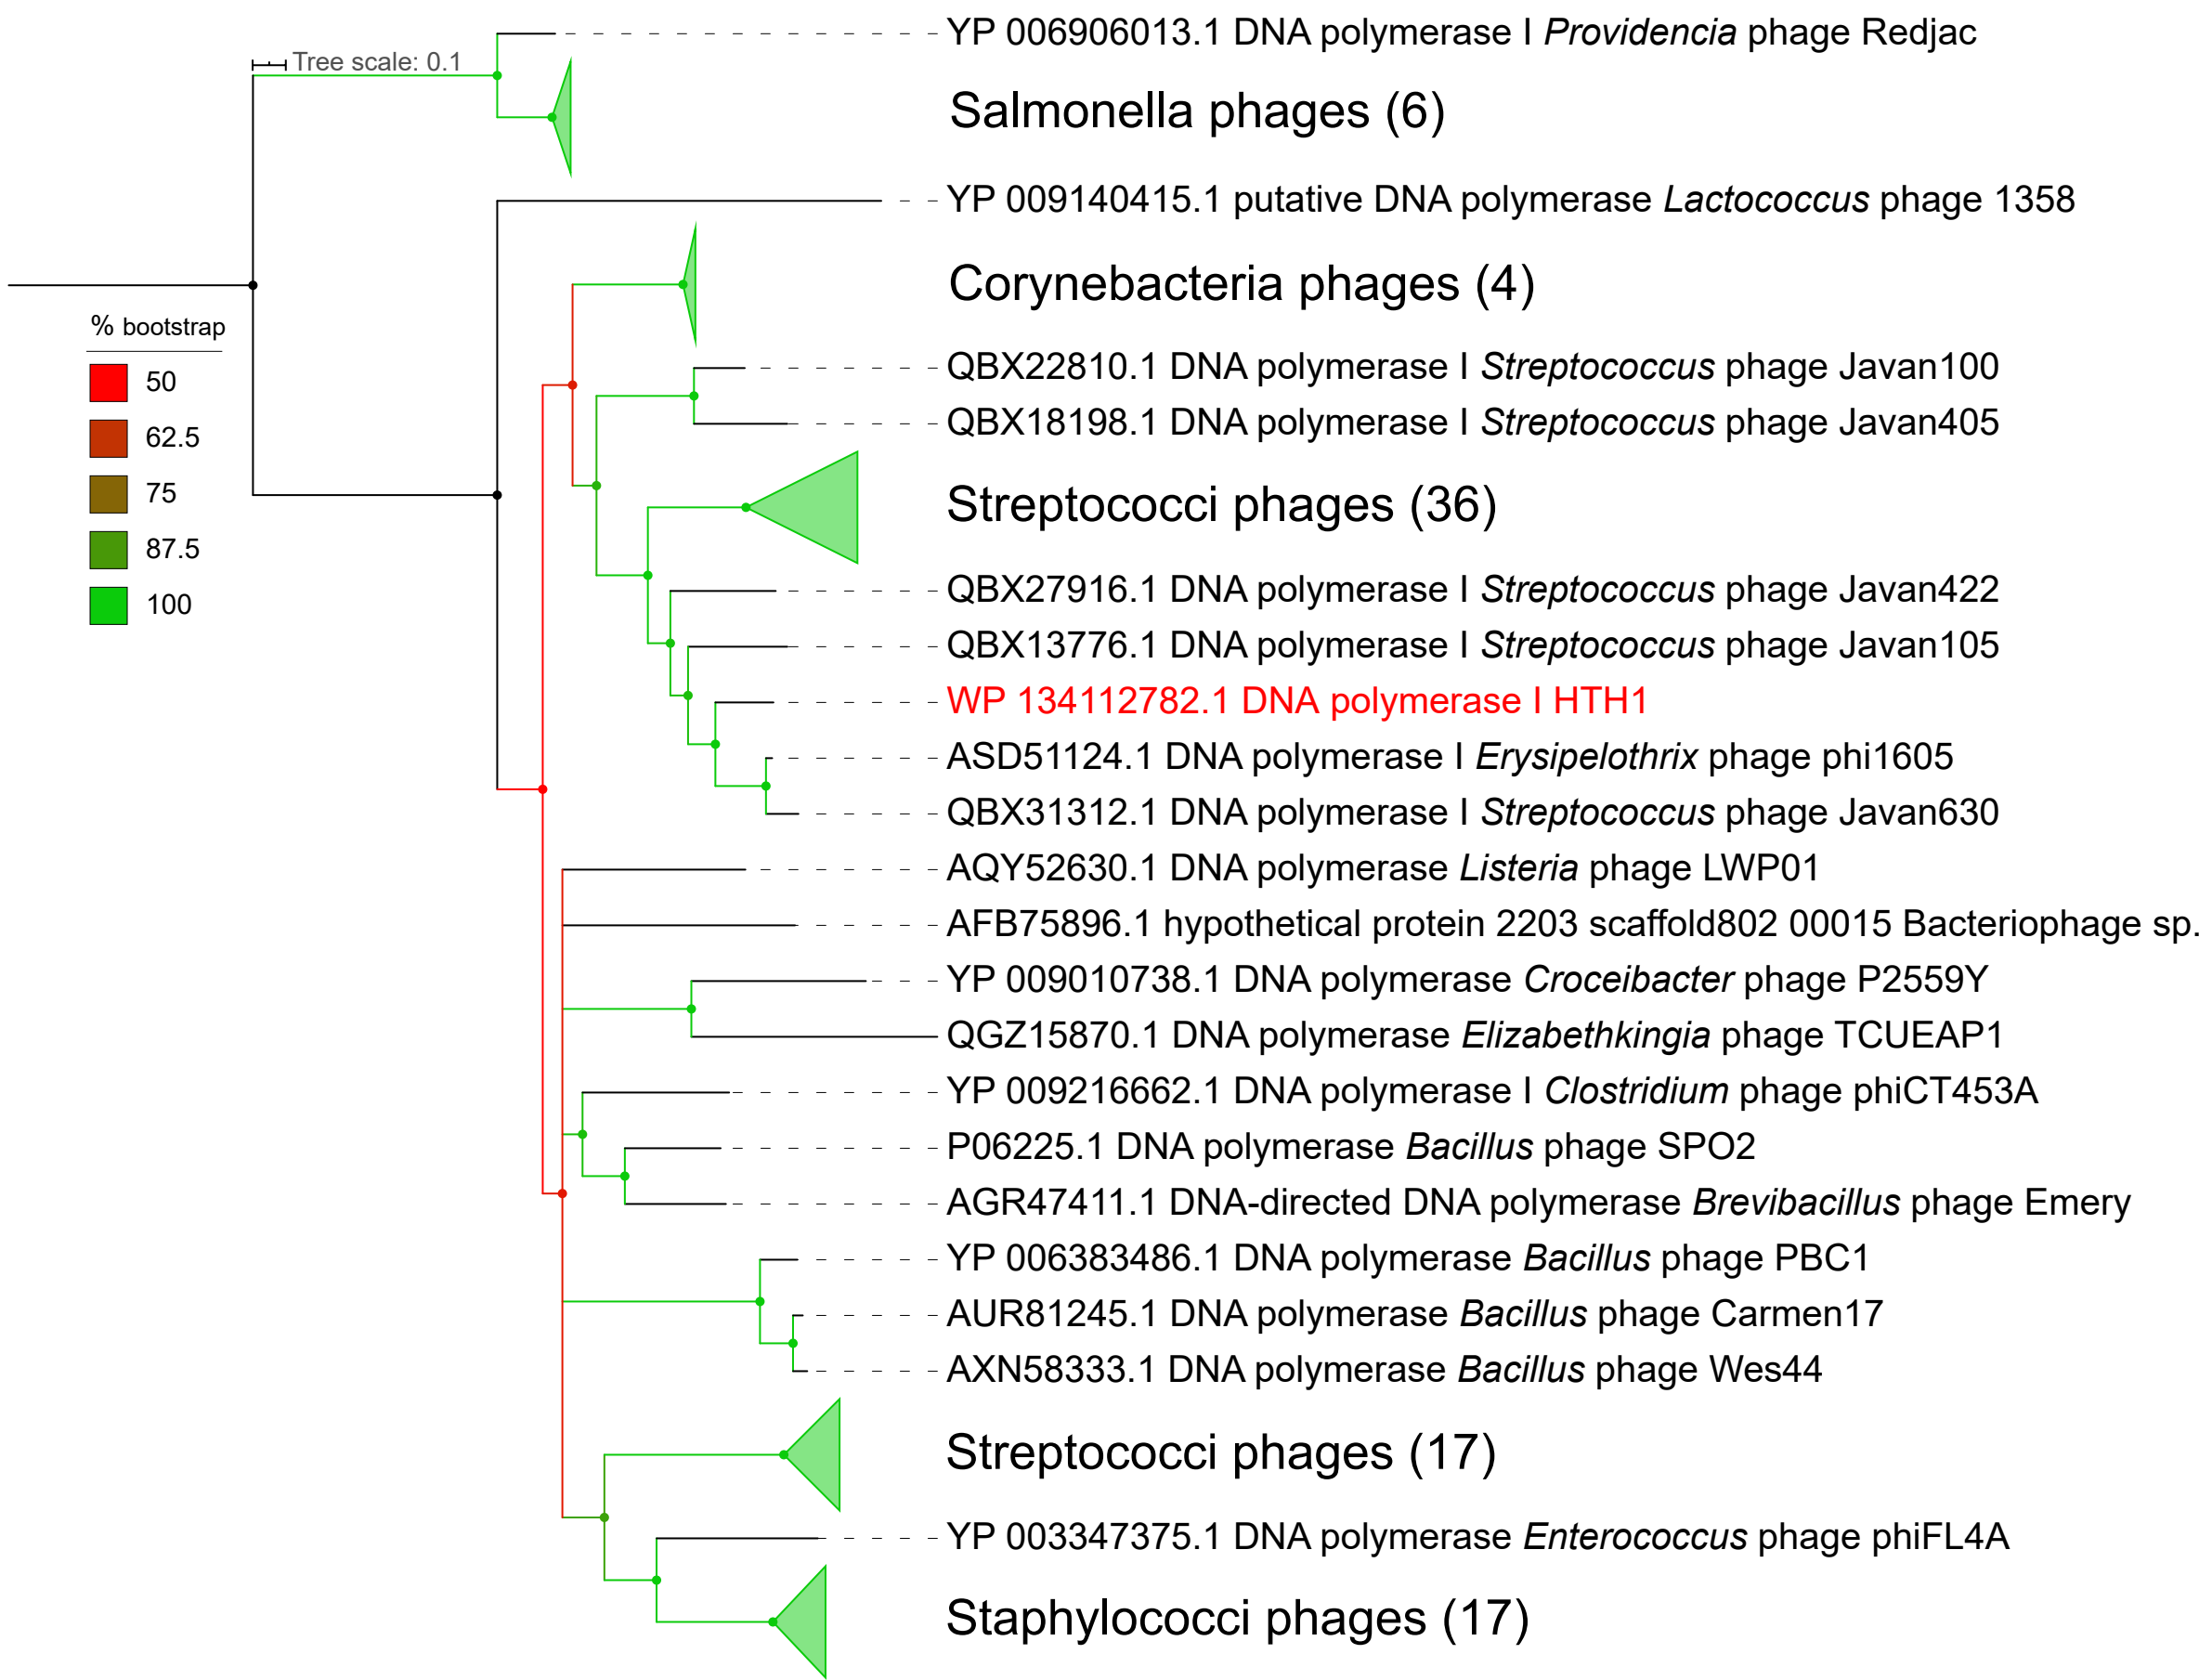

Supplement: s1 [file s1]

Tree scale: 1

% bootstrap

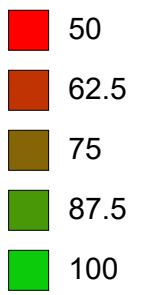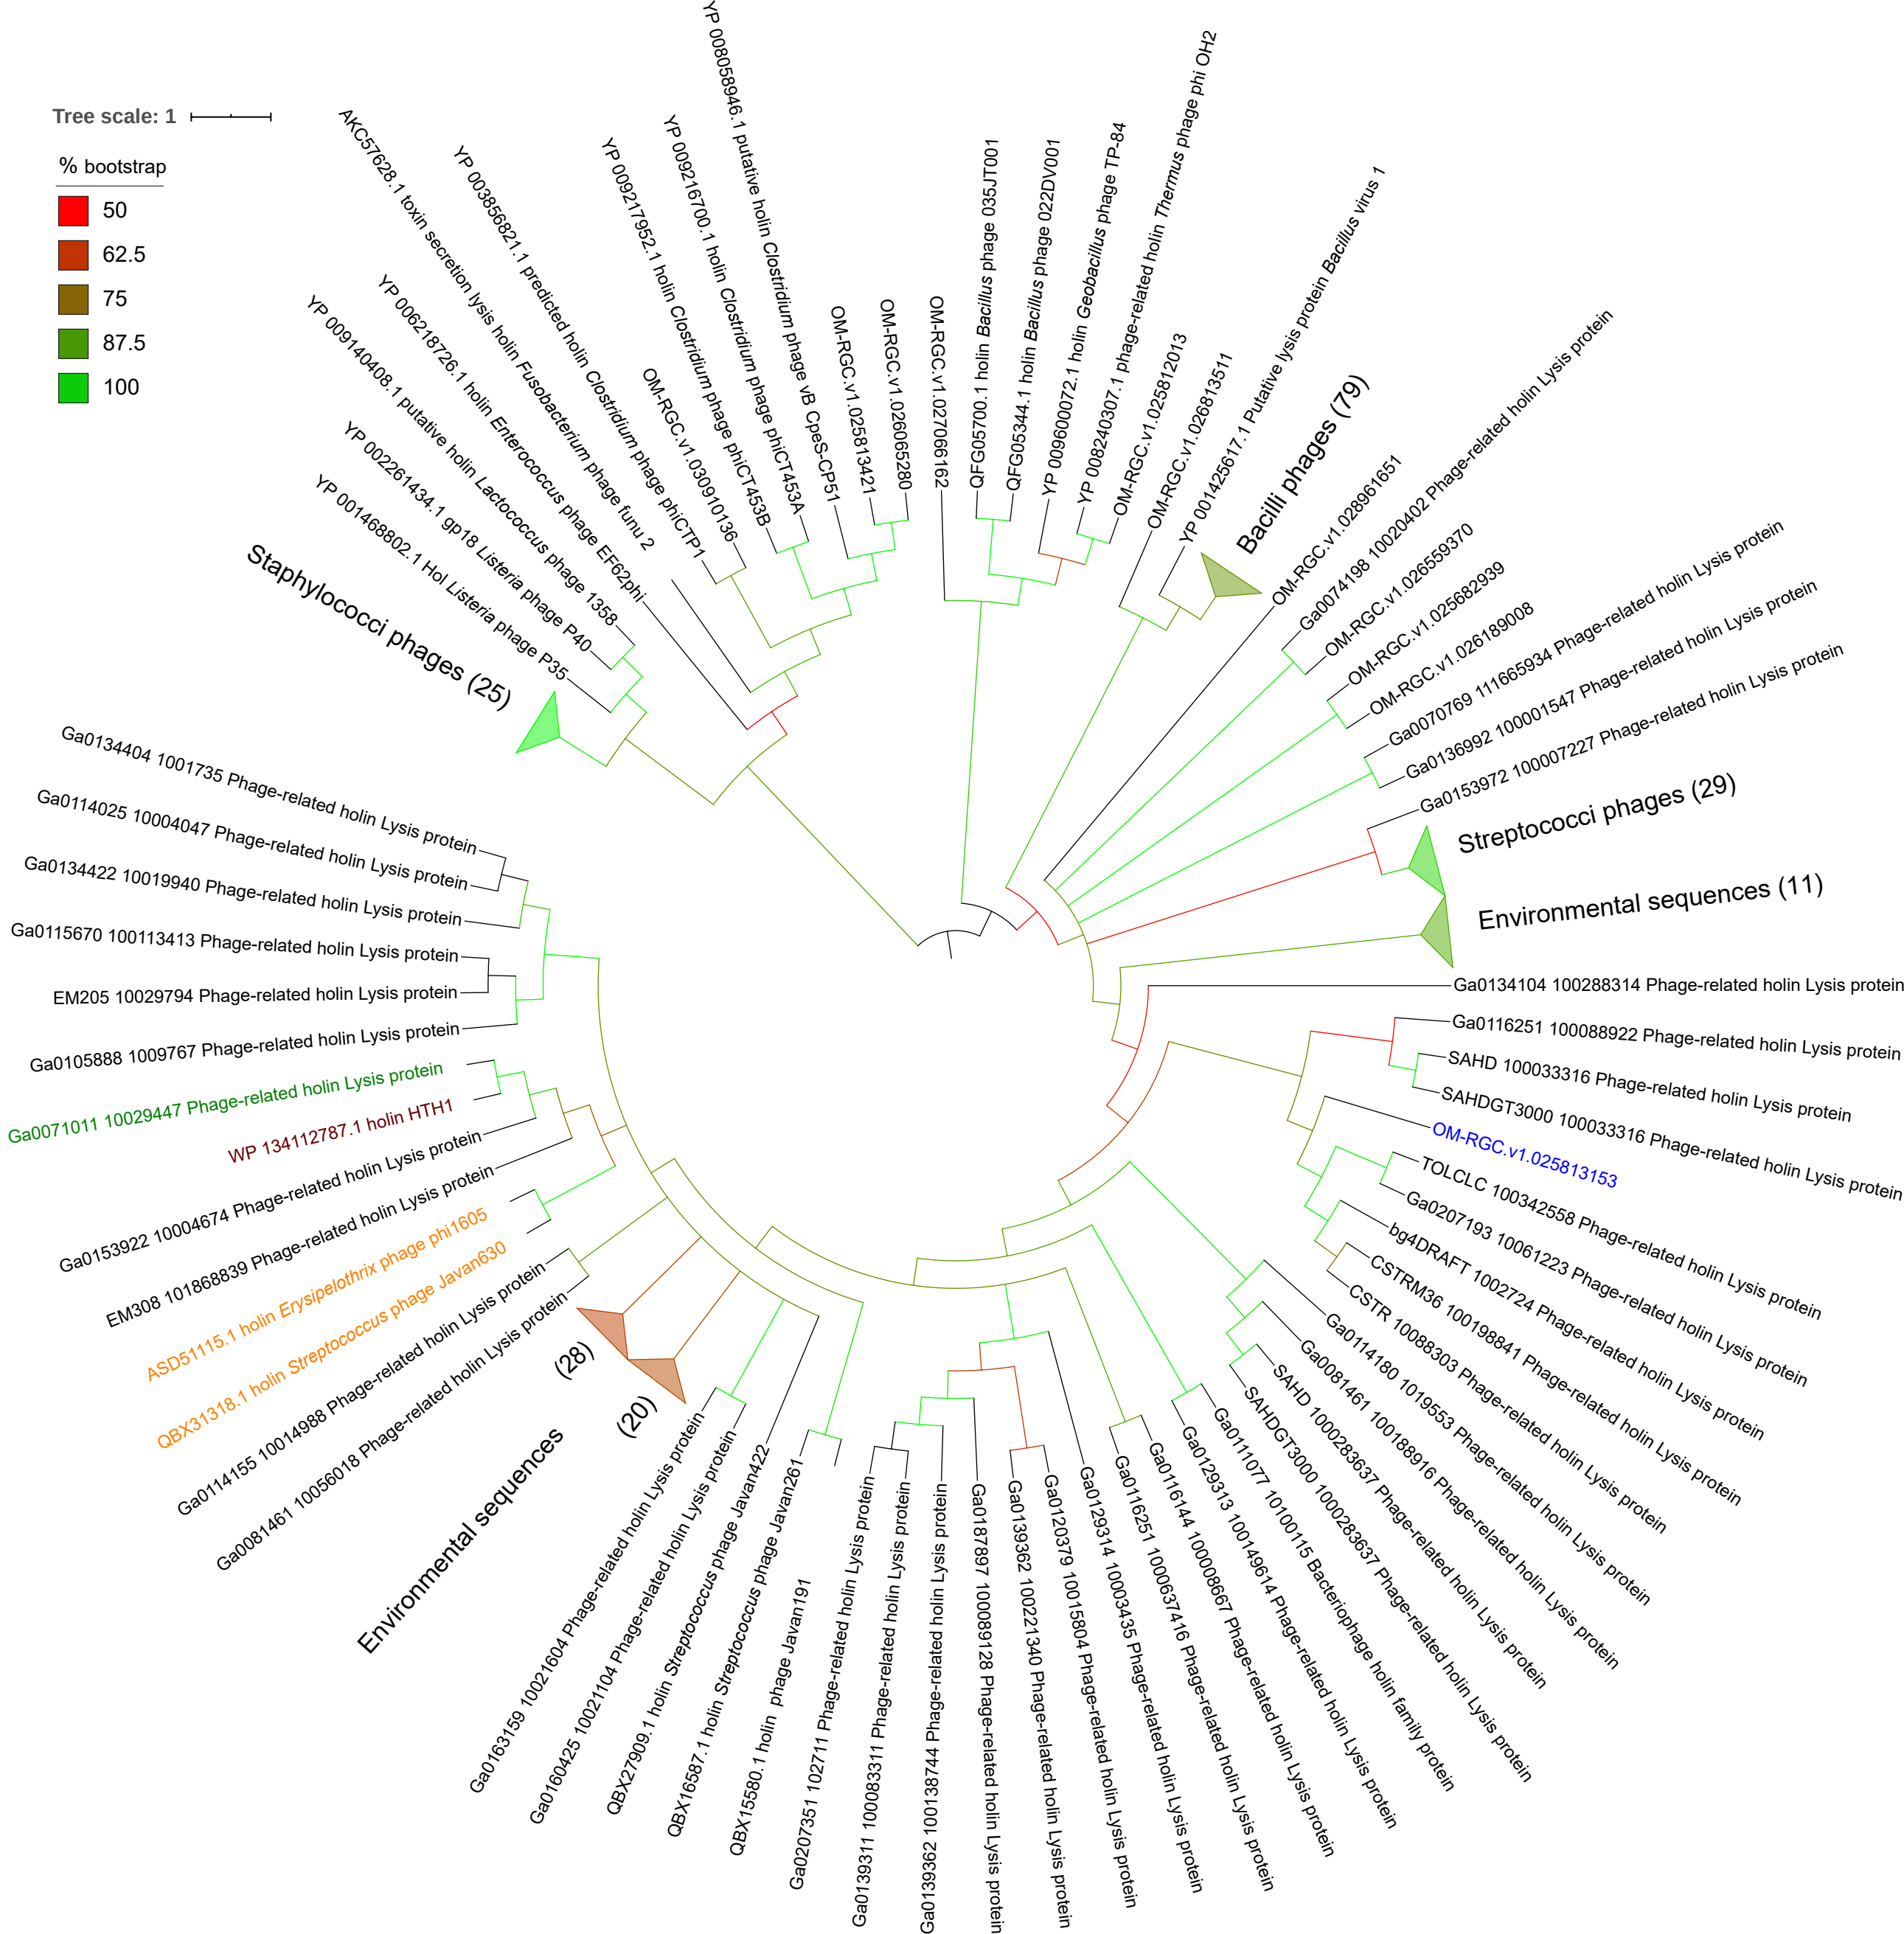

Supplement: s1 [file s1]
